# Supplementary material for: Distribution, Potential Sources, and Health Risk of Microplastics (MPs) in Street Dust during and after COVID-19 Lockdown in Bangladesh
Source: MDPI journal article supplement (doi:10.3390/environments10070130), 2023-07-21
Supplement: s1 [file s1]

**Table S1: FTIR spectra peak assignment for the MP type identification**

The main peaks for HDPE MPs spectrums were at 3022  $\text{cm}^{-1}$ , 2891  $\text{cm}^{-1}$ , and 1095  $\text{cm}^{-1}$  for C-H,  $\text{CH}_2$  and C-C respectively; for nylon 6, it was at 3298  $\text{cm}^{-1}$ , 2934  $\text{cm}^{-1}$ , and 1636  $\text{cm}^{-1}$  for N-H, C-H and C=O respectively; for PAA it was at 1653-1654  $\text{cm}^{-1}$ , 3300  $\text{cm}^{-1}$ , and 3410  $\text{cm}^{-1}$  for C=O, OH and  $\text{NH}_2$  respectively. PDMS gave adjacent double peaks at 789-796  $\text{cm}^{-1}$ , 1020-1074  $\text{cm}^{-1}$ , and 2950-2960  $\text{cm}^{-1}$  for Si-C, Si-O-Si and  $\text{CH}_3$  respectively and for PP, it was at 2920  $\text{cm}^{-1}$ , 1456  $\text{cm}^{-1}$ , and 990  $\text{cm}^{-1}$  for -O-H,  $\text{CH}_3$  and  $\text{CH}_2$  respectively. The main peaks for fibre MPs spectrums were at 3500-3000  $\text{cm}^{-1}$ , 1630  $\text{cm}^{-1}$ , and 1000-1500  $\text{cm}^{-1}$  for -O-H, -C-O- and -C-H respectively; for cellulose, it was at 3391  $\text{cm}^{-1}$ , 2906  $\text{cm}^{-1}$ , and 1061  $\text{cm}^{-1}$  for -O-H, -C-H and -C-O- respectively and for PET it was at 3700  $\text{cm}^{-1}$ , 2500  $\text{cm}^{-1}$ , 1710  $\text{cm}^{-1}$ , 1380  $\text{cm}^{-1}$ , 1100  $\text{cm}^{-1}$  and 900  $\text{cm}^{-1}$  for -O-H, -C-H, -C=O-, -C-O-C-, -C-H and aromatic -C-H respectively. For PVA MPs spectrums were at 3550-3200  $\text{cm}^{-1}$ , 2840-3000  $\text{cm}^{-1}$ , 1750-1735  $\text{cm}^{-1}$  and 1461-1417  $\text{cm}^{-1}$  for O-H, C-H, C=O and  $\text{CH}_2$  respectively; LDPE gave adjacent double peaks at 3070-3085  $\text{cm}^{-1}$ , 2345-2370  $\text{cm}^{-1}$ , 1812-1820  $\text{cm}^{-1}$ , and 1055-1065  $\text{cm}^{-1}$  for C-H, C-C, C=O and  $\text{CH}_2$  respectively and for PE, it was the C-H (flexural) at 690-900  $\text{cm}^{-1}$ , C-C at 1475-1600  $\text{cm}^{-1}$  and C-H (vibratory) at 3 000  $\text{cm}^{-1}$  were observed.

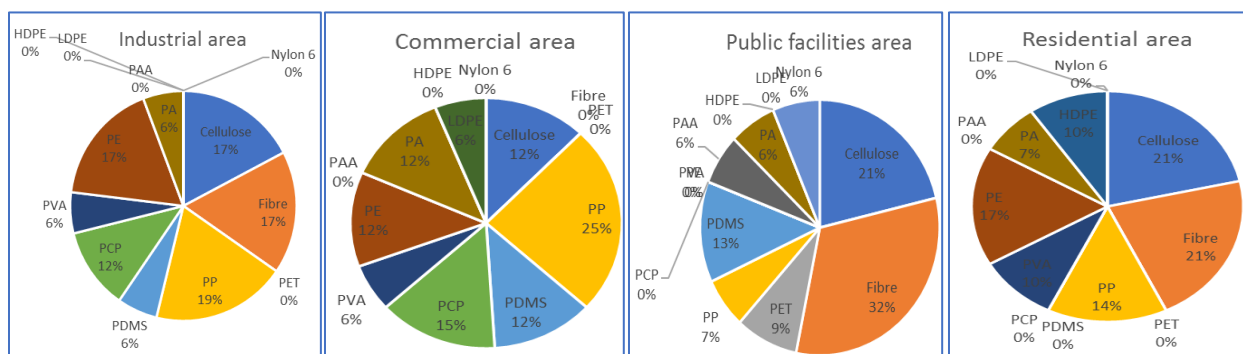

**(a) Without lockdown**

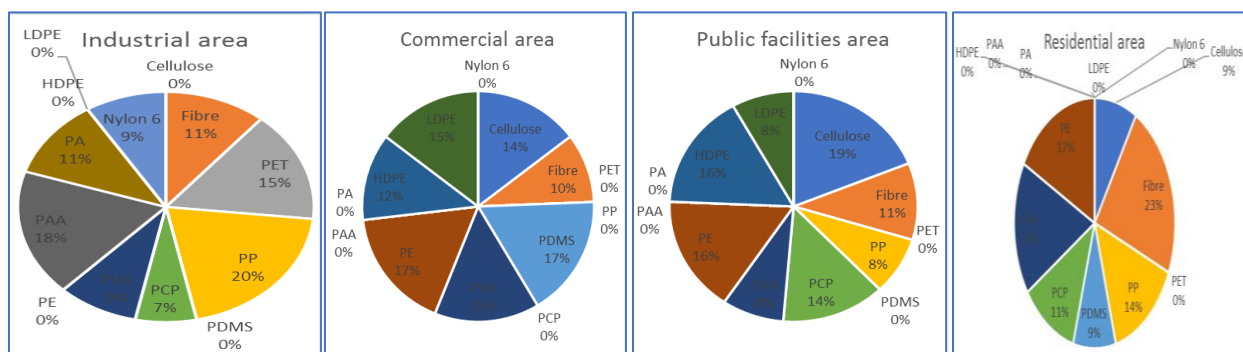

**(b) Partial lockdown**

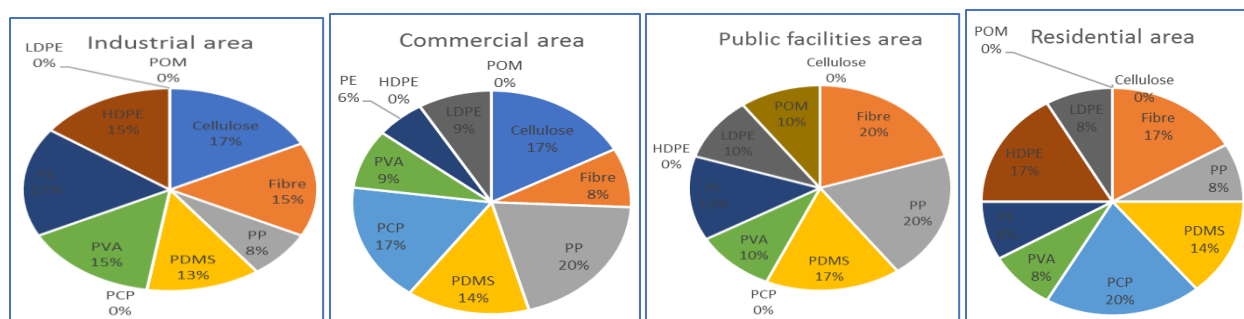

(c) complete lockdown

**Figure S1. Distribution of MP types in dusts from the different land use category.**
